# Supplementary material for: Two-way shape memory polymer with “switch–spring” composition by interpenetrating polymer network
Source: Royal Society of Chemistry journal article supplement (doi:10.1039/c4ta03640a), 2014-09-05

## Supporting Information

# Two-Way Shape Memory Polymer with “Switch-Spring” Composition by Interpenetrating Polymer Network

Y. Wu,<sup>a</sup> J. Hu,<sup>\*,a,b</sup> J. Han,<sup>a</sup> Y. Zhu,<sup>a</sup> H. Huang<sup>a</sup>, J. Li<sup>c</sup> and B. Tang<sup>c</sup>

<sup>a</sup> Institute of Textiles & Clothing, The Hong Kong Polytechnic University, Hung Hom, Kowloon, Hong Kong.

<sup>b</sup> The Hong Kong Polytechnic University Shenzhen Base, 518057, Shenzhen, China..

<sup>c</sup> Department of Chemistry, Hong Kong University of Science & Technology, Clear Water Bay, Kowloon, Hong Kong.

Figure S1, the DSC curve of the samples.

Cross-linked PCL, 2<sup>nd</sup> heat flow (x from -45 to 140, y range about 35 mW)

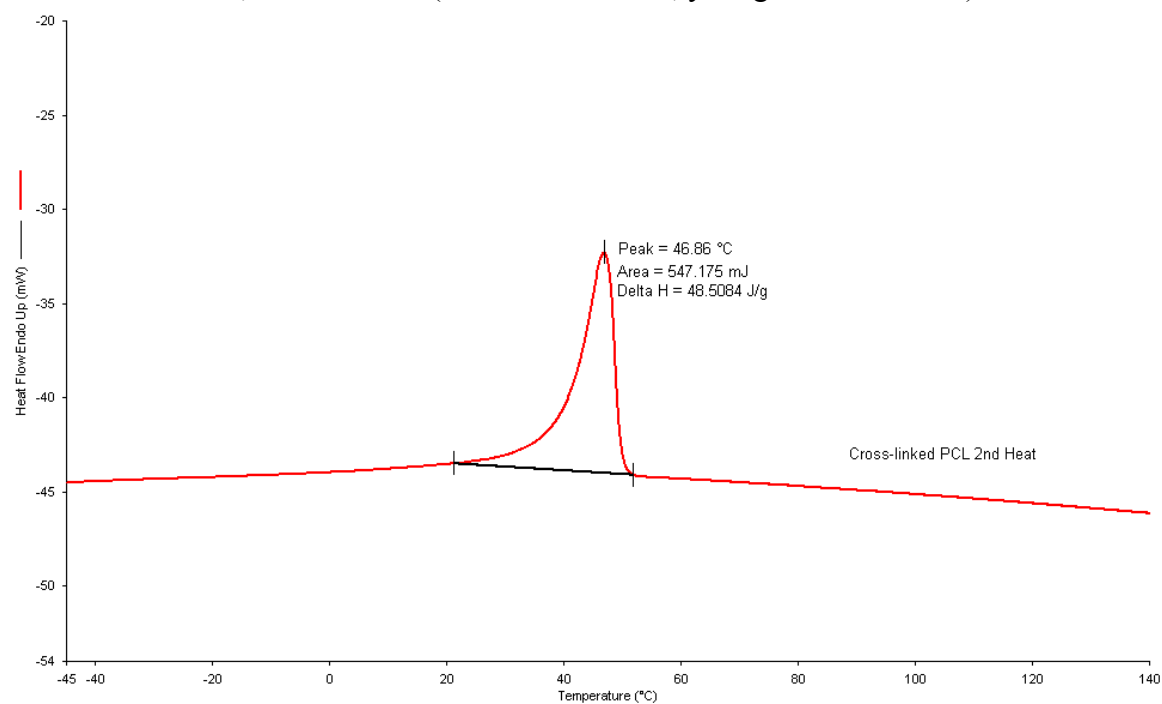

Cross-linked PTMEG, 2<sup>nd</sup> heat flow (x from -45 to 140, y range about 35 mW)

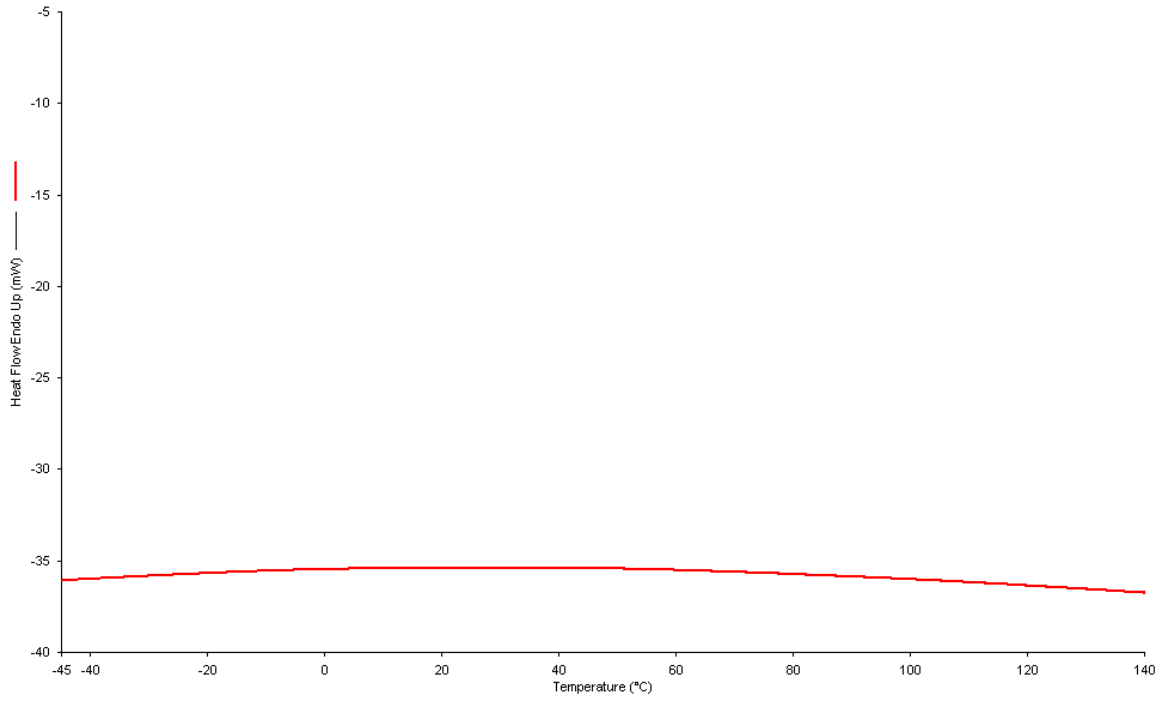

Sample No.7, 2<sup>nd</sup> heat flow (x from -45 to 140, y range about 35 mW)

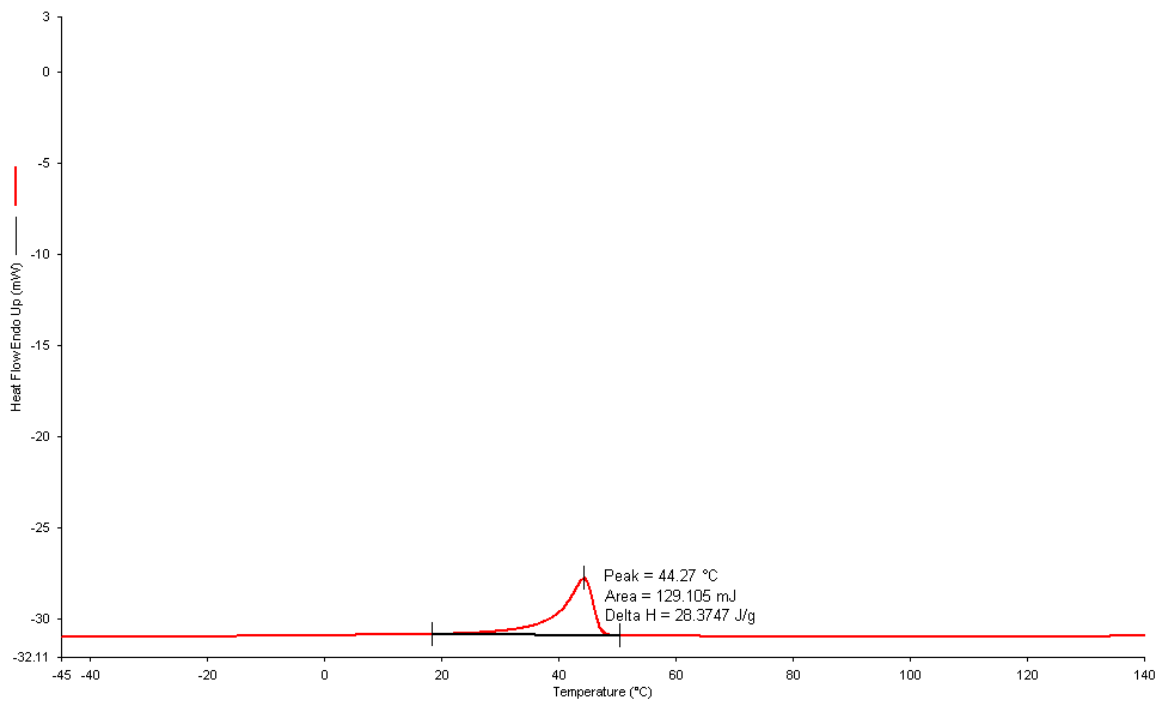

Sample No.6, 2<sup>nd</sup> heat flow (x from -45 to 140, y range about 35 mW)

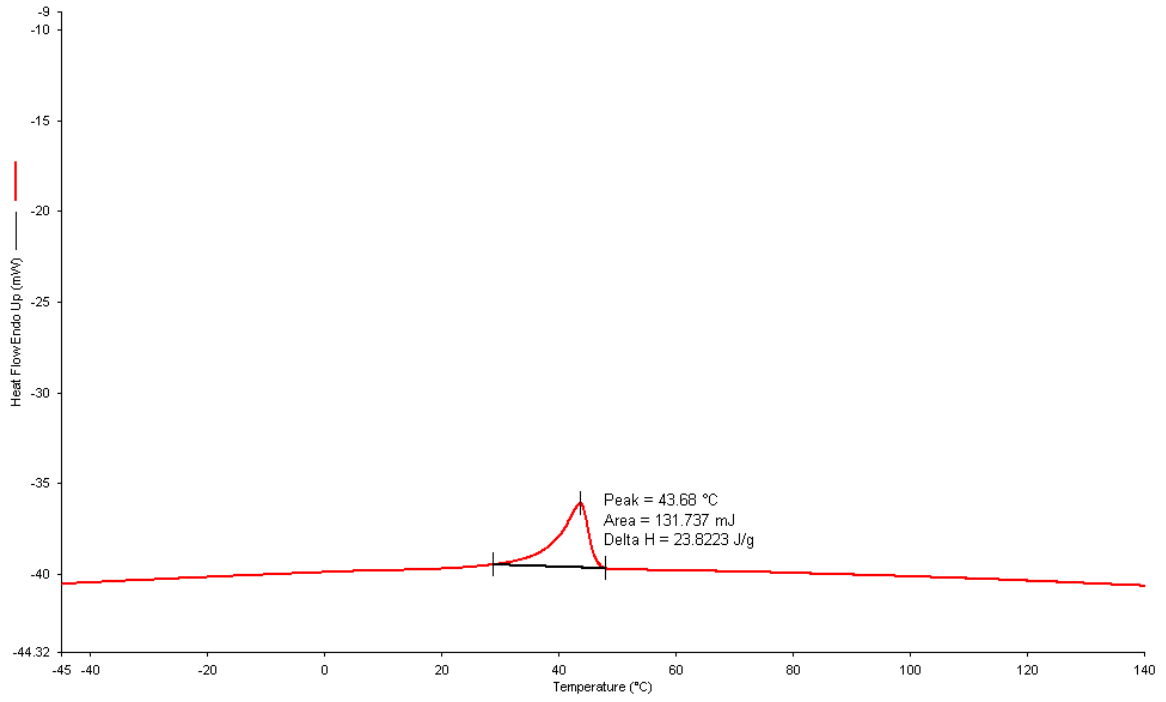

Sample No.5, 2<sup>nd</sup> heat flow (x from -45 to 140, y range about 35 mW)

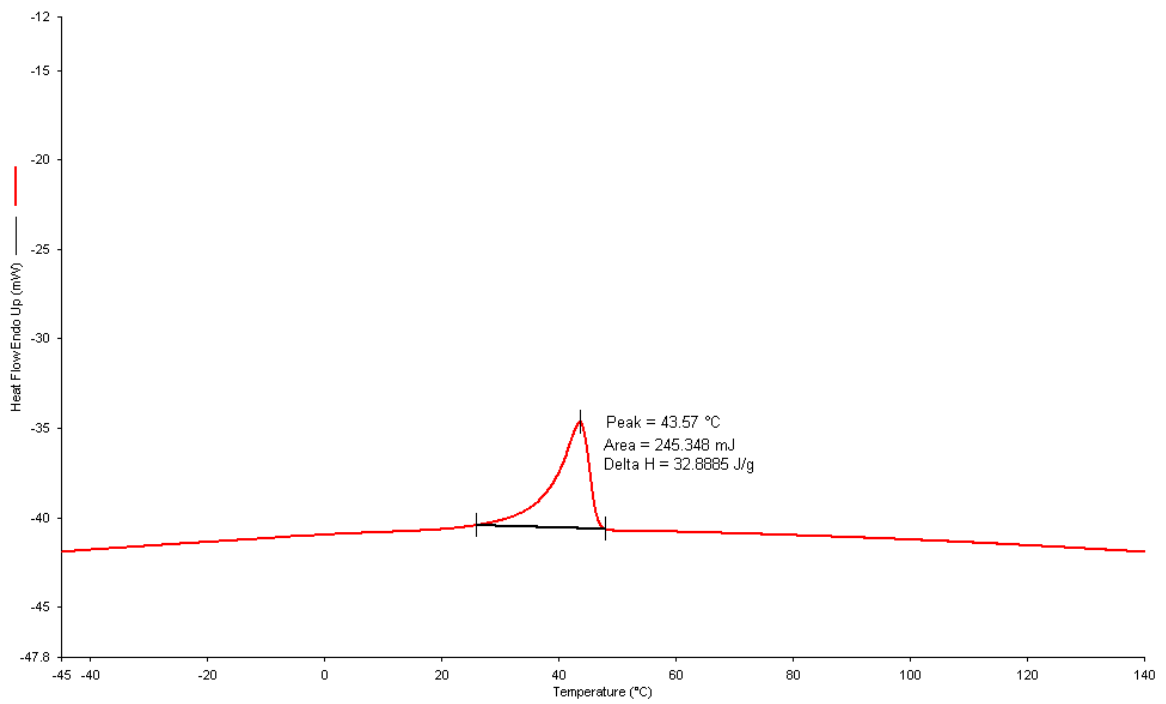

Sample No.4, 2<sup>nd</sup> heat flow (x from -45 to 140, y range about 35 mW)

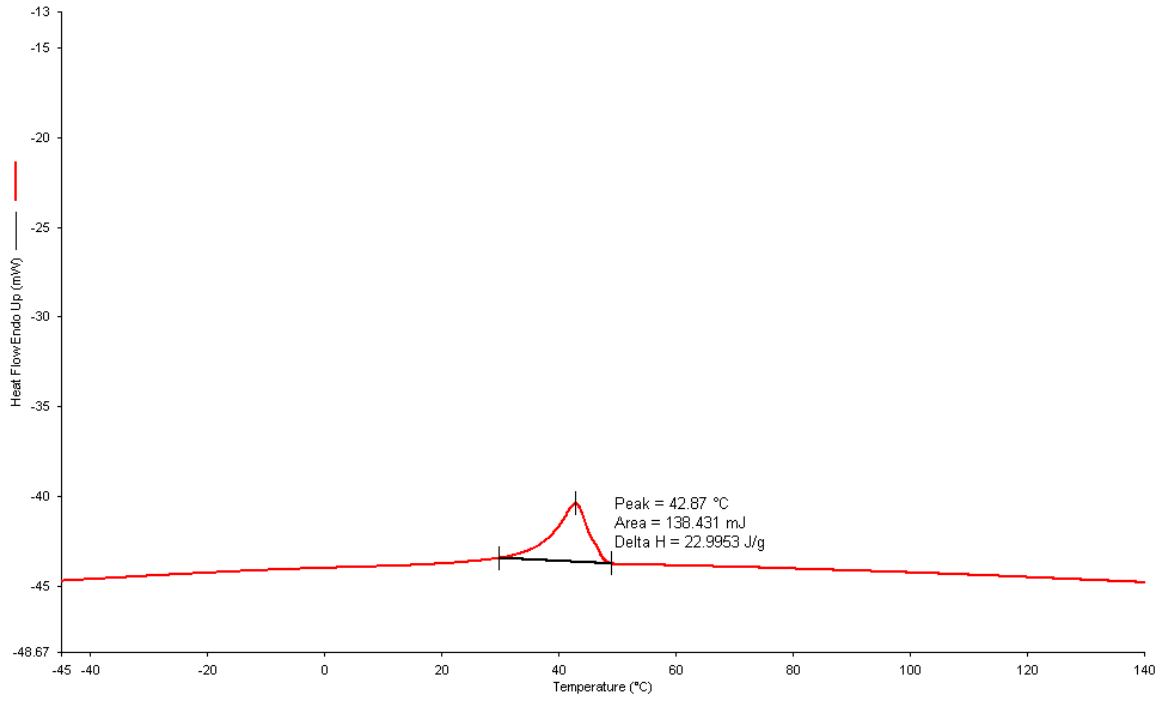

Sample No.3, 2<sup>nd</sup> heat flow (x from -45 to 140, y range about 35 mW)

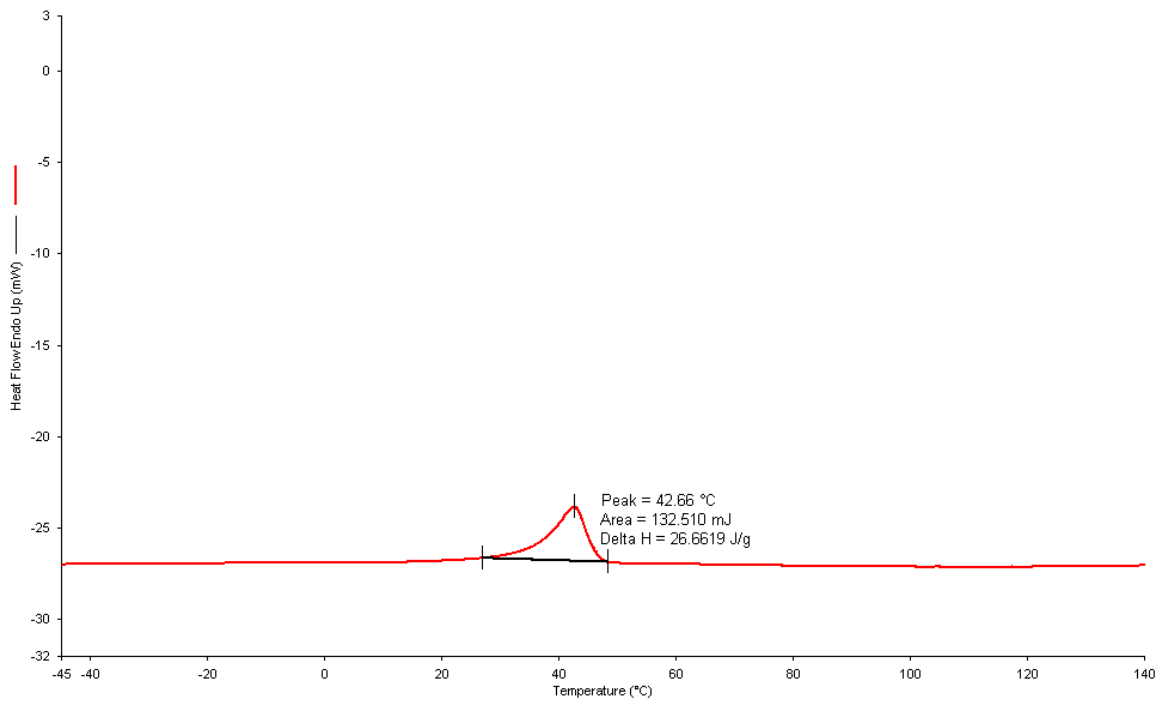

Sample No.2, 2<sup>nd</sup> heat flow (x from -45 to 140, y range about 35 mW)

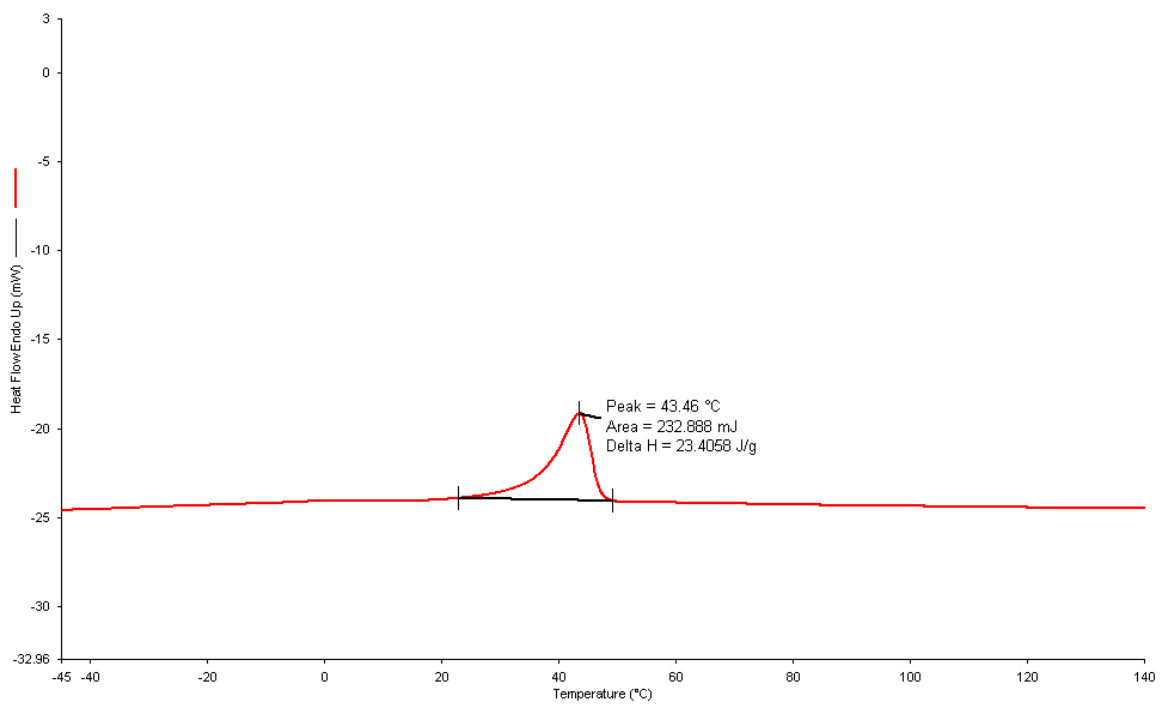

Figure S2, the 1D-XRD of samples (Sample C-1 and Sample 5)  
Sample C-1

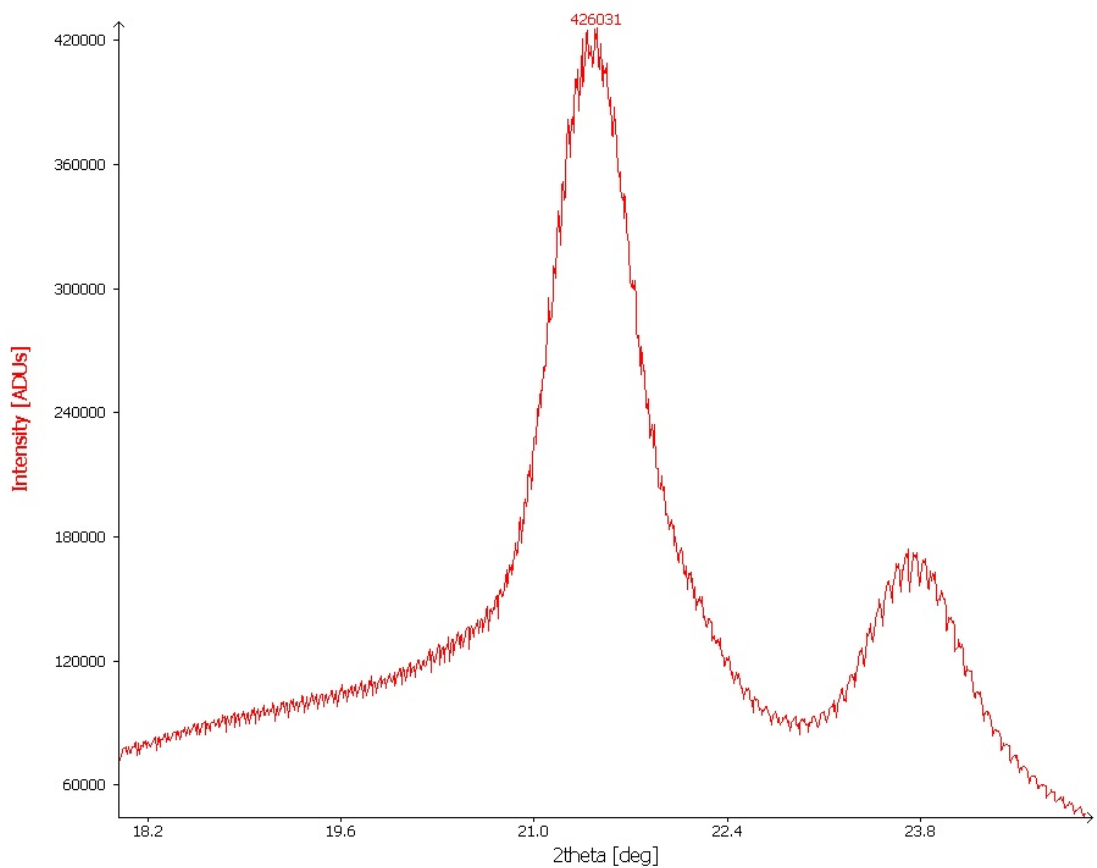

Sample 5

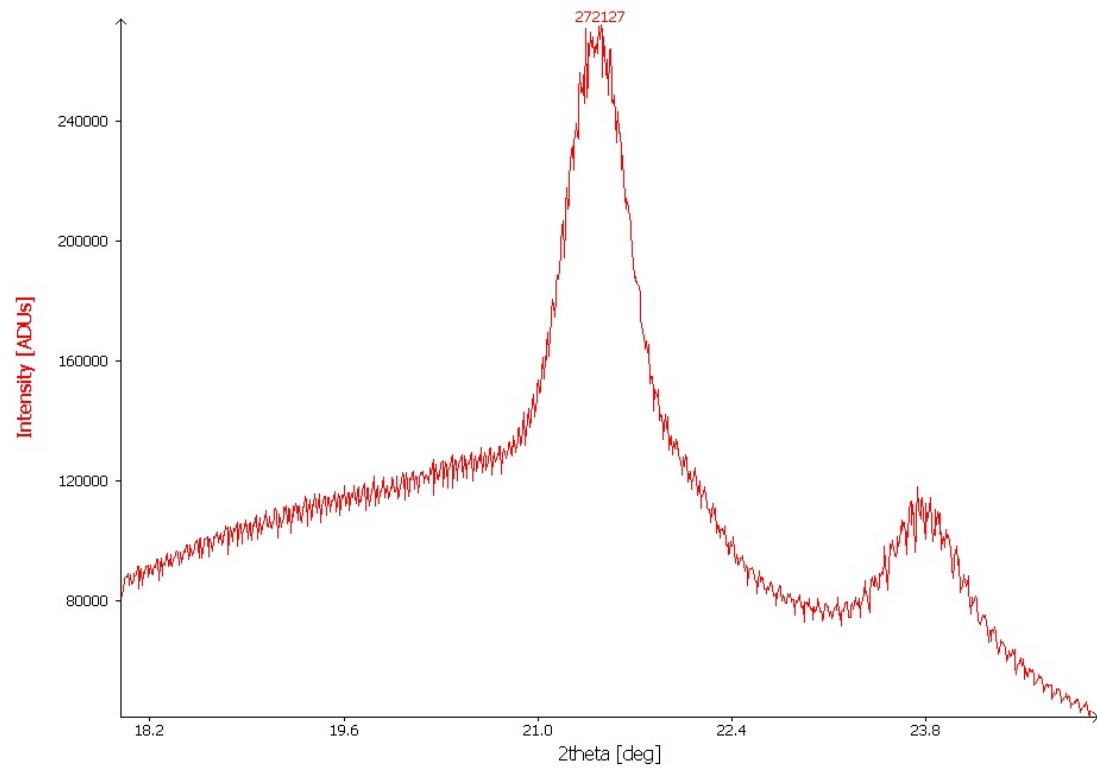

Supplement: c4ta03640a1.pdf [file c4ta03640a1.pdf]
